# Supplementary material
Source: PubMed Central journal article supplement (PMC8581889)
Supplement: ajtr0013-11501-f5.pdf [file ajtr0013-11501-f5.pdf]

# Study of the MFN2<sup>Ile213Thr</sup> mutant

## Supplementary Material 1

### 1. Electromyography results of the proband.

| Muscles                          | Side  | Slack status       |                        |                    |                    | With mild force             |                   |                        |                      |                 | With heavy force   |                    |             |            | Other |                   |
|----------------------------------|-------|--------------------|------------------------|--------------------|--------------------|-----------------------------|-------------------|------------------------|----------------------|-----------------|--------------------|--------------------|-------------|------------|-------|-------------------|
|                                  |       | Inserted potential | fibrillation potential | positive potential | Myotonic potential | Beam fibrillation potential | average time (ms) | average amplitude (mv) | polyphasic potential | giant potential | Myopathy potential | Interference phase | mixed phase | pure phase |       | largest amplitude |
| tibialis anterior                | left  | 10                 | 10                     | 10                 |                    | ↑                           | ↑                 |                        |                      |                 |                    |                    | √           |            |       |                   |
| peroneus longus                  | left  | 10                 | 10                     | 10                 |                    | ↑                           | ↑                 |                        |                      |                 |                    |                    | √           |            |       |                   |
| extensor digitorum brevis        | left  | 10                 | 10                     | 20                 |                    | ↑                           | ↑                 |                        |                      |                 |                    |                    | √           |            |       |                   |
| musculus gastrocnemius           | left  | 0                  |                        |                    |                    | 0                           | 0                 |                        |                      |                 |                    |                    | √           |            |       |                   |
| medial vastus muscle             | left  | 0                  |                        |                    |                    | ↑                           | ↑                 |                        |                      |                 |                    |                    | √           |            |       |                   |
| tibialis anterior                | right | 10                 | 10                     | 20                 |                    | ↑                           | ↑                 |                        |                      |                 |                    |                    | √           |            |       |                   |
| peroneus longus                  | right | 10                 | 10                     | 10                 |                    | ↑                           | ↑                 |                        |                      |                 |                    |                    | √           |            |       |                   |
| extensor digitorum brevis        | right | 10                 | 10                     | 20                 |                    | ↑                           | ↑                 |                        |                      |                 |                    |                    | √           |            |       |                   |
| musculus gastrocnemius           | right | 0                  |                        |                    |                    | 0↑                          | 0↑                |                        |                      |                 |                    |                    | √           |            |       |                   |
| medial vastus muscle             | right | 10                 | 10                     | 10                 |                    | ↑                           | ↑                 |                        |                      |                 |                    |                    | √           |            |       |                   |
| paravertebral muscle T11         | right | -                  |                        | 10                 |                    | ↑                           | ↑                 |                        |                      |                 |                    |                    |             |            |       |                   |
| paravertebral muscle T12         | left  | 0                  |                        |                    |                    | 0                           | 0                 |                        |                      |                 |                    |                    |             |            |       |                   |
| first dorsal interosseus         | left  | 0                  |                        |                    |                    | ↑                           | ↑                 |                        |                      |                 |                    |                    | √           |            |       |                   |
| musculi abductor pollicis brevis | left  | 0                  |                        |                    |                    | ↑                           | ↑                 |                        |                      |                 |                    | √                  | √           |            |       |                   |
| extensor digitorum               | left  | 0                  |                        |                    |                    | ↑                           | ↑                 |                        |                      |                 |                    | √                  |             |            |       |                   |
| deltoideus triangularis          | left  | 0                  |                        |                    |                    | 0                           | 0                 |                        |                      |                 |                    | √                  |             |            |       |                   |
| bicipital muscle of arm          | left  | 0                  |                        |                    |                    | 0                           | 0                 |                        |                      |                 |                    | √                  |             |            |       |                   |
| first dorsal interosseus         | right | -                  | ±                      | ±                  |                    | ↑                           | ↑                 |                        |                      |                 |                    |                    | √           |            |       |                   |
| musculi abductor pollicis brevis | right | 0                  |                        |                    |                    | 0↑                          | 0↑                |                        |                      |                 |                    | √                  |             |            |       |                   |
| extensor digitorum               | right | 0                  |                        |                    |                    | 0                           | 0                 |                        |                      |                 |                    | √                  |             |            |       |                   |
| deltoideus triangularis          | right | 0                  |                        |                    |                    | 0                           | 0                 |                        |                      |                 |                    | √                  |             |            |       |                   |
| bicipital muscle of arm          | right | 0                  |                        |                    |                    | 0                           | 0                 |                        |                      |                 |                    | √                  |             |            |       |                   |

## Study of the MFN2<sup>Ile213Thr</sup> mutant

| Motor nerve conduction     |                  |                                  |                   |       |                |       |                                              |       |                       |
|----------------------------|------------------|----------------------------------|-------------------|-------|----------------|-------|----------------------------------------------|-------|-----------------------|
| Nerve                      | Stimulating spot | Recording spot                   | Latency time (ms) |       | Amplitude (mv) |       | Conduction velocity or excitation rate (m/s) |       | Other                 |
|                            |                  |                                  | left              | right | left           | right | left                                         | right |                       |
| deep peroneal nerve        | Capitula fibula  | tibialis anterior                | 12.2              | 20.1  | 8.4            | 4.6   | 11                                           | 7     |                       |
| superficial peroneal nerve | Capitula fibula  | peroneus longus                  | 14.4              | 13.8  | 5.6            | 7.4   | 9                                            | 11    |                       |
| total peroneal nerve       | ankle            | extensor digitorum brevis        | 25.8              | 7.2   | 2.8            | 2.7   | 7                                            | 12    |                       |
|                            | Capitula fibula  |                                  | 87.0              | 32.9  | 2.5            | 2.7   |                                              |       |                       |
| nervus tibialis            | popliteal fossa  | musculus gastrocnemius           | 16.0              | 30.3  | 8.6            | 3.2   | 10                                           | 7     |                       |
| nervus femoralis           |                  | medial vastus muscle             | 39.4              | 71.8  | 2.3            | 1.0   | 7                                            | 3     |                       |
| ulnar nerve                | wrist            | first dorsal interosseus         | 15.1              | 10.9  | 7.9            | 11.4  | 5                                            | 6     | Waveform from several |
|                            | elbow            |                                  | 59.8              | 53.2  | 9.0            | 6.4   |                                              |       | Waveform from several |
| nervus medianus            | wrist            | musculi abductor pollicis brevis | 11.8              | 12.0  | 3.8            | 2.3   | 4                                            | 5     | Waveform from several |
|                            | elbow            |                                  | 58.5              | 54.6  | 4.1            | 1.4   |                                              |       | Waveform from several |
| musculospiralis            | radial groove    | extensor digitorum               | 28.9              | 28.1  | 2.9            | 2.3   | 7                                            | 8     | Waveform from several |
| musculocutaneous nerve     | ERB'S            | deltoideus triangularis          | 28.7              | 20.6  | 2.0            | 2.9   | 9                                            | 11    | Waveform from several |
| axillary nerve             | ERB'S            | bicipital muscle of arm          | 12.1              | 26.2  | 6.1            | 6.7   | 12                                           | 6     | Waveform from several |

  

| Sensory nerve conduction   |                  |                |                   |         |                |       |                       |       |       |
|----------------------------|------------------|----------------|-------------------|---------|----------------|-------|-----------------------|-------|-------|
| Nerve                      | Stimulating spot | Recording spot | Latency time (ms) |         | Amplitude (mv) |       | Excitation rate (m/s) |       | Other |
|                            |                  |                | left              | right   | left           | right | left                  | right |       |
| ulnar nerve                | little finger    | wrist          | no SNAP           | no SNAP |                |       |                       |       |       |
| nervus medianus            | digitus medius   | wrist          | no SNAP           | no SNAP |                |       |                       |       |       |
| superficial peroneal nerve |                  |                | no SNAP           | no SNAP |                |       |                       |       |       |
| nervus suralis             |                  |                | no SNAP           | no SNAP |                |       |                       |       |       |

**Results description:** Electromyography shows fibrillar, positive phase potential, action potential amplitude, time-limit widening increased when light force; Motor nerve conduction amplitude is normal/mild decrease; nerve conduction velocity is about 10 m/s (which is unusual in CMT2A); sensory nerve conduction is seriously without SNAP.

## Study of the MFN2<sup>Ile213Thr</sup> mutant

### 2. Detailed data of the vector construction and cell transfection.

#### (1) cDNA sequences

No. pHS-AVC-LY059 (wild-type) MFN2 (human, NM\_014874)

5'-ATGTCCCTGCTCTTCTCTCGATGCAACTCTATCGTCACAGTCAAGAAAAATAAGAGACACATGGCTGAGGTG-AATGCATCCCCACTTAAGCACTTTGTCAGTCCCAAGAAGAAGATCAATGGCATTGTTGAGCAGCTGGGGCCCTAC-ATCCAGGAGAGCGCCACCTTCCCTTGAAGACACGTACAGGAATGCAGAACTGGACCCCGTTACCACAGAAGAACA-GGTTCTGGACGTCAAAGGTTACCTATCCAAAGTGAGAGGCATCAGTGAGGTGCTGGCTCGGAGGCACATG-AAAGTGGCTTTTTTGGCCGGACGAGCAATGGGAAGAGCACCGTGATCAATGCCATGCTCTGGGACAAAGTTCT-GCCCTCTGGGATTGGCCACACCACCAATTGCTTCCCTGCGGGTAGAGGGCACAGATGGCCATGAGGCCTTTCTCC-TTACCGAGGGCTCAGAGGAAAAGAGGAGTGCCAAGACTGTGAACCAGCTGGCCCATGCCCTCCACCAGGACAA-GCAGCTCCATGCCGGCAGCCTAGTGAGTGTGATGTGGCCCAACTCTAAGTGCCCACTTCTGAAGGATGACCTCG-TTTTGATGGACAGCCCTGGTATTGATGTCACCACAGAGCTGGACAGCTGGATTGACAAGTTTTGTCTGGATGCT-GATGTGTTTTGTGCTGGTGGCCAACTCAGAGTCCACCCTGATGCAGACGGAAAAGCACTTCTTCCACAAGGTGA-GTGAGCGTCTCTCCCGGCCAAACATCTTCATCCTGAACAACCGCTGGGATGCATCTGCCTCAGAGCCCGAGTAC-ATGGAGGAGGTGCGGCGGCAGCACATGGAGCGTTGTACCAGCTTCCCTGGTGGATGAGCTGGGCGTGGTGGATC-GATCCCAGGCCGGGGACCGCATCTTCTTTGTGCTGCTAAGGAGGTGCTCAACGCCAGGATTCAGAAAGCCCA-GGGCATGCCTGAAGGAGGGGGCGCTCTCGCAGAAGGCTTTCAAGTGAGGATGTTGAGTTTTCAGAAATTTGAG-AGGAGATTTGAGGAGTGCATCTCCAGTCTGCAGTGAAGACCAAGTTTGAGCAGCACACGGTCCGGGCCAAGC-AGATTGCAGAGGCGGTTCCGACTCATCATGGACTCCCTGCACATGGCGGCTCGGGAGCAGCAGGTTTACTGCGA-GGAAATGCGTGAAGAGCGGCAAGACCGACTGAAATTTATTGACAAACAGCTGGAGCTCTTGGCTCAAGACTA-TAAGCTGCGAATTAAGCAGATTACGGAGGAAGTGGAGAGGCAGGTGTCGACTGCAATGGCCGAGGAGATC-AGGCGCCTCTCTGTACTGGTGGACGATTACCAGATGGACTTCCACCCTTCTCCAGTAGTCCCAAGGTTTATAA-GAATGAGCTGCACCGCCACATAGAGGAAGGACTGGGTCGAAACATGTCTGACCGCTGCTCCACGGCCATCAC-CAACTCCCTGCAGACCATGCAGCAGGACATGATAGATGGCTTGAACCCCTCCTTCCCTGTGTGCTGCGGAG-TCAGATAGACATGCTGCTCCACGCCAGTGCTTCTCCCTCAACTATGACCTAAACTGTGACAAGCTGTGTGCT-GACTTCCAGGAAGACATTGAGTTCCATTTCTCTCTCGGATGGACCATGCTGGTGAATAGGTTCCCTGGGCCCA-AGAACAGCCGTCGGGCCCTTGATGGGCTACAATGACCAGTCCAGCGTCCCATCCCTCTGACGCCAGCCAACCC-CAGCATGCCCCACTGCCACAGGGCTCGCTCACCCAGGAGGAGTTCATGGTTTCCATGGTTACCGCCCTGGCC-TCCCTTGACATCCAGGACCTCCATGGGCATTCTTGTGTTGGAGGAGTGGTGTGGAAGGCAGTGGGCTGGCGG-CTCATTGCCCTCTCCTTTGGGCTCTATGGCCTCCTCTACGTCTATGAGCGTCTGACCTGGACCACCAAGGCCAA-GGAGAGGGCCCTTCAAGCGCCAGTTTGTGGAGCATGCCAGCGAGAAGCTGCAGCTTGTGCATCAGCTACACTGG-CTCCAAGTGCAGCCACCAAGTCCAGCAGGAAGTGTCTGGGACCTTTGCTCATCTGTGTGAGCAAGTTGACGTC-ACCCGGGAGAACCTGGAGCAGGAAATTGCCGCCATGAACAAGAAAATTGAGGTTCTTGACTCACTTCAGAGCA-AAGCAAAGCTGCTCAGGAATAAAGCCGTTGGTTGGACAGTGAGCTCAACATGTTACACACCAGTACCTGCA-GCCAGCAGA-3'

No. pHS-AVC-LY060 (mutant) MFN2(human,NM\_014874, 638T>C)

5'-ATGTCCCTGCTCTTCTCTCGATGCAACTCTATCGTCACAGTCAAGAAAAATAAGAGACACATGGCTGAGGT-GAATGCATCCCCACTTAAGCACTTTGTCAGTCCCAAGAAGAAGATCAATGGCATTGTTGAGCAGCTGGGGGCC-TACATCCAGGAGAGCGCCACCTTCCCTTGAAGACACGTACAGGAATGCAGAACTGGACCCCGTTACCACAGAAG-AACAGGTTCTGGACGTCAAAGGTTACCTATCCAAAGTGAGAGGCATCAGTGAGGTGCTGGCTCGGAGGCACAT-GAAAGTGGCTTTTTTGGCCGGACGAGCAATGGGAAGAGCACCGTGATCAATGCCATGCTCTGGGACAAAGTT-CTGCCCTCTGGGATTGGCCACACCACCAATTGCTTCCCTGCGGGTAGAGGGCACAGATGGCCATGAGGCCTTTC-TCCTTACCGAGGGCTCAGAGGAAAAGAGGAGTGCCAAGACTGTGAACCAGCTGGCCCATGCCCTCCACCAGG-ACAAGCAGCTCCATGCCGGCAGCCTAGTGAGTGTGATGTGGCCCAACTCTAAGTGCCCACTTCTGAAGGATG-ACCTCGTTTTGATGGACAGCCCTGGTATTGATGTCACCACAGAGCTGGACAGCTGGACTGACAAGTTTTGTCT-GGATGCTGATGTGTTGTGCTGGTGGCCAACTCAGAGTCCACCCTGATGCAGACGGAAAAGCACTTCTTCCA-CAAGGTGAGTGAGCGTCTCTCCCGGCCAAACATCTTCATCCTGAACAACCGCTGGGATGCATCTGCCTCAGA-GCCCGAGTACATGGAGGAGGTGCGGCGGCAGCACATGGAGCGTTGTACCAGCTTCCCTGGTGGATGAGCTGGG-CGTGGTGGATCGATCCCAGGCCGGGGACCGCATCTTCTTTGTGCTGCTAAGGAGGTGCTCAACGCCAGGATT-CAGAAAGCCAGGGCATGCCTGAAGGAGGGGGCGCTCTCGCAGAAGGCTTTCAAGTGAGGATGTTTGTGATT-TCAGAAATTTGAGAGGAGATTTGAGGAGTGCATCTCCAGTCTGCAGTGAAGACCAAGTTTGTGAGCAGCACAG-GTCCGGGCCAAGCAGATTGCAGAGGCGTTTCGACTCATCATGGACTCCCTGCACATGGCGGCTCGGGAGCAG-

## Study of the MFN2<sup>Ile213Thr</sup> mutant

CAGGTTTACTGCGAGGAAATGCGTGAAGAGCGGCAAGACCGACTGAAATTTATTGACAAACAGCTGGAGCTCT-TGGCTCAAGACTATAAGCTGCGAATTAAGCAGATTACGGAGGAAGTGGAGAGGCAGGTGTCGACTGCAATGG-CCGAGGAGATCAGGCGCCTCTCTGTAAGTGGTGGACGATTACCAGATGGACTTCCACCCTTCTCCAGTAGCC-TCAAGTTTATAAGAAATGAGCTGCACCGCCACATAGAGGAAGGACTGGGTCGAAACATGTCTGACCGCTGC-TCCACGGCCATCACCAACTCCCTGCAGACCATGCAGCAGGACATGATAGATGGCTTCAAACCCCTCCTTCTCT-GTGTCTGTGCGGAGTCAGATAGACATGCTGGTCCCACGCCAGTGTCTCTCCCTCAACTATGACCTAAACTGT-GACAAGCTGTGTGCTGACTTCCAGGAAGACATTGAGTTCCATTTCTCTCTCGGATGGACCATGCTGGTGAATA-GGTTCTGGGCCCCAAGAACAGCCGTCGGGCCTTGATGGGCTACAATGACCAGGTCCAGCGTCCCATCCCTC-TGACGCCAGCAACCCAGCATGCCCCACTGCCACAGGGCTCGCTCACCCAGGAGGAGTTCATGGTTTCC-ATGGTTACCGGCCTGGCCTCCTTGACATCCAGGACCTCCATGGGCATTCTTGTGGTGGAGGAGTGGTGTGG-AAGGCAGTGGGCTGGCGGCTCATTGCCCTCTCCTTTGGGCTCTATGGCCTCTCTACGTCTATGAGCGTCTGA-CCTGGACCACCAAGGCCAAGGAGAGGGCCTTCAAGCGCCAGTTTGTGGAGCATGCCAGCGAGAAGCTGCAG-CTTGTCATCAGCTACACTGGCTCCAAGTGCAGCCACCAAGTCCAGCAGGAACTGTCTGGGACCTTTGCTCATC-TGTGTCAGCAAGTTGACGTCACCCGGGAGAACCTGGAGCAGGAAATTGCCGCCATGAACAAGAAAATTGAG-GTTCTTGACTCACTTCAGAGCAAAGCAAAGCTGCTCAGGAATAAAGCCGGTTGGTTGGACAGTGAGCTCAACA-TGTTACACACCAGTACCTGCAGCCCAGCAGA-3'

### (2) Vector backbone diagram

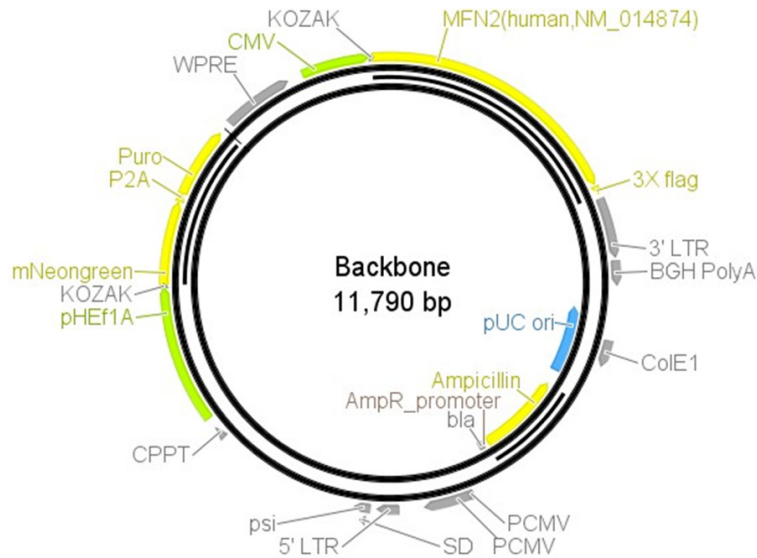

### (3) Primers used in the vector construction and QF-PCR

| Target        | Forward-primer       | Reverse-primer        | Segment length (bp) |
|---------------|----------------------|-----------------------|---------------------|
| MFN2          | GGACCCCGTTACCACAGAAG | TTGTCCAGAGCATGGCATT   | 162                 |
| MFN2 (638T>C) | GGACCCCGTTACCACAGAAG | TTGTCCAGAGCATGGCATT   | 162                 |
| GAPDH         | TGACTTCAACAGCGACCCCA | CACCCTGTTGCTGTAGCCAAA | 121                 |

### (4) Data of QF-PCR (48 h after transfection)

| Gene | Group               | Repetition 1 | Repetition 2 | Repetition 3 | Mean     | SD      | QC <sup>1</sup> |
|------|---------------------|--------------|--------------|--------------|----------|---------|-----------------|
| MFN2 | 293FT               | 0.3          | 0.3          | 0.3          | 0.315    | 0.014   | 0.046           |
|      | 293FT-pHS-AVC-LY059 | 2452.4       | 2435.5       | 2385.4       | 2424.436 | 34.872  | 0.014           |
|      | 293FT-pHS-AVC-LY060 | 5673.4       | 5673.4       | 5442.3       | 5596.371 | 133.432 | 0.024           |
|      | 293FT-pHS-BVC-LW345 | 1.0          | 1.0          | 1.0          | 1.000    | 0.012   | 0.012           |

<sup>1</sup>QC, the value of standard deviation/mean. The larger the value, the higher the volatility of the experimental data.

## Study of the MFN2<sup>Ile213Thr</sup> mutant

**Supplementary Table 1.** List of differentiated compounds

| m/z      | FC<br>(pHS-AVC-<br>LY059/<br>pHS-AVC-<br>LY060) | log <sub>2</sub> (FC) | raw. pval | vip    | compound_id | compound_name              | adduct             | delta<br>(ppm) | sub-<br>class                                      | Source                                               | KEGG_<br>com-<br>pound | KEGG_<br>pathway                                                                                                                                                     | KEGG_pathway_<br>descriptionn                                                                                                                                                                                                                                                                                                                                                                                                       |
|----------|-------------------------------------------------|-----------------------|-----------|--------|-------------|----------------------------|--------------------|----------------|----------------------------------------------------|------------------------------------------------------|------------------------|----------------------------------------------------------------------------------------------------------------------------------------------------------------------|-------------------------------------------------------------------------------------------------------------------------------------------------------------------------------------------------------------------------------------------------------------------------------------------------------------------------------------------------------------------------------------------------------------------------------------|
| 89.9414  | 3.5093                                          | 1.8112                | 0.079369  | 1.7718 | HMDB0013667 | Yttrium                    | [M+H] <sup>+</sup> | 315            | -                                                  | Endogenous                                           | -                      | -                                                                                                                                                                    | -                                                                                                                                                                                                                                                                                                                                                                                                                                   |
| 116.9269 | 3.9056                                          | 1.9656                | 0.045241  | 1.9133 | HMDB0029596 | Chloroform                 | [M-H] <sup>-</sup> | 169            | Halo-<br>meth-<br>anes                             | Endogenous <br>Food <br>Environmental <br>Biological | C13827                 | -                                                                                                                                                                    | -                                                                                                                                                                                                                                                                                                                                                                                                                                   |
| 122.0958 | 0.46894                                         | -1.0925               | 0.072381  | 1.798  | HMDB0001020 | N, N-Dimethyl-<br>aniline  | [M+H] <sup>+</sup> | 5              | Amines                                             | Endogenous <br>Food <br>Biological                   | C02846                 | -                                                                                                                                                                    | -                                                                                                                                                                                                                                                                                                                                                                                                                                   |
| 128.0368 | 4.5875                                          | 2.1977                | 0.004952  | 2.1955 | HMDB0000267 | L-5-Oxoproline             | [M-H] <sup>-</sup> | 12             | Amino<br>acids,<br>peptides,<br>and ana-<br>logues | Endogenous <br>Food <br>Biological                   | C01879                 | map00480;<br>map01100                                                                                                                                                | Glutathione metabolism; Metabolic pathways                                                                                                                                                                                                                                                                                                                                                                                          |
| 137.0271 | 0.46029                                         | -1.1194               | 0.055543  | 1.8665 | HMDB0000500 | 4-Hydroxyben-<br>zoic acid | [M-H] <sup>-</sup> | 20             | Benzoic<br>acids<br>and<br>deriva-<br>tives        | Endogenous <br>Food <br>Biological                   | C00156                 | map00130;<br>map00362;<br>map00363;<br>map00623;<br>map00627;<br>map00790;<br>map01061;<br>map01100;<br>map01110;<br>map01120;<br>map01220;<br>map01240;<br>map07110 | Ubiquinone and other terpenoid-quinone bio-<br>synthesis; Benzoate degradation; Bisphenol<br>degradation; Toluene degradation; Amino-<br>benzoate degradation; Folate biosynthesis;<br>Biosynthesis of phenylpropanoids; Metabolic<br>pathways; Biosynthesis of secondary metabo-<br>lites; Microbial metabolism in diverse environ-<br>ments; Degradation of aromatic compounds;<br>Biosynthesis of cofactors; Benzoic acid family |
| 141.112  | 0.33401                                         | -1.582                | 0.003465  | 2.2178 | HMDB0029598 | Metenamine                 | [M+H] <sup>+</sup> | 11             | 1,3,5-tri-<br>azinanes                             | Endogenous <br>Food                                  | -                      | -                                                                                                                                                                    | -                                                                                                                                                                                                                                                                                                                                                                                                                                   |
| 167.0225 | 0.46796                                         | -1.0955               | 0.054323  | 1.8719 | HMDB0000289 | Uric acid                  | [M-H] <sup>-</sup> | 9              | Purines<br>and<br>purine<br>deriva-<br>tives       | Endogenous <br>Food <br>Biological                   | C00366                 | map00230;<br>map01100;<br>map01120;<br>map04976                                                                                                                      | Purine metabolism; Metabolic pathways; Mi-<br>crobial metabolism in diverse environments;<br>Bile secretion                                                                                                                                                                                                                                                                                                                         |

## Study of the MFN2<sup>Ile213Thr</sup> mutant

|          |        |        |          |        |             |                  |                    |    |                                      |                                            |        |                                                                                                                                                                                                                                                          |                                                                                                                                                                                                                                                                                                                                                                                                                                                                                                                                                                                                                                                                                                                                                                                                                                                                                                                                                                                                                                        |
|----------|--------|--------|----------|--------|-------------|------------------|--------------------|----|--------------------------------------|--------------------------------------------|--------|----------------------------------------------------------------------------------------------------------------------------------------------------------------------------------------------------------------------------------------------------------|----------------------------------------------------------------------------------------------------------------------------------------------------------------------------------------------------------------------------------------------------------------------------------------------------------------------------------------------------------------------------------------------------------------------------------------------------------------------------------------------------------------------------------------------------------------------------------------------------------------------------------------------------------------------------------------------------------------------------------------------------------------------------------------------------------------------------------------------------------------------------------------------------------------------------------------------------------------------------------------------------------------------------------------|
| 191.0215 | 9.5827 | 3.2604 | 0.082728 | 1.7595 | HMDB0000094 | Citric acid      | [M-H] <sup>-</sup> | 9  | Tricarboxylic acids and derivatives  | Endogenous   Food   Synthetic   Biological | C00158 | map00020; map00250; map00630; map00720; map00997; map01053; map01060; map01061; map01062; map01063; map01064; map01065; map01066; map01070; map01100; map01110; map01120; map01200; map01210; map01230; map01240; map02020; map04742; map04922; map05230 | Citrate cycle (TCA cycle); Alanine, aspartate and glutamate metabolism; Glyoxylate and dicarboxylate metabolism; Carbon fixation pathways in prokaryotes; Biosynthesis of various secondary metabolites - part 3; Biosynthesis of siderophore group nonribosomal peptides; Biosynthesis of plant secondary metabolites; Biosynthesis of phenylpropanoids; Biosynthesis of terpenoids and steroids; Biosynthesis of alkaloids derived from shikimate pathway; Biosynthesis of alkaloids derived from ornithine, lysine and nicotinic acid; Biosynthesis of alkaloids derived from histidine and purine; Biosynthesis of alkaloids derived from terpenoid and polyketide; Biosynthesis of plant hormones; Metabolic pathways; Biosynthesis of secondary metabolites; Microbial metabolism in diverse environments; Carbon metabolism; 2-Oxocarboxylic acid metabolism; Biosynthesis of amino acids; Biosynthesis of cofactors; Two-component system; Taste transduction; Glucagon signaling pathway; Central carbon metabolism in cancer |
| 212.0413 | 4.2951 | 2.1027 | 0.016832 | 2.0793 | HMDB0001511 | Phosphocreatine  | [M+H] <sup>+</sup> | 8  | Amino acids, peptides, and analogues | Endogenous                                 | C02305 | map00330; map01100                                                                                                                                                                                                                                       | Arginine and proline metabolism; Metabolic pathways                                                                                                                                                                                                                                                                                                                                                                                                                                                                                                                                                                                                                                                                                                                                                                                                                                                                                                                                                                                    |
| 217.1039 | 0.3095 | -1.692 | 0.074128 | 1.7914 | HMDB0029027 | Prolyl-Threonine | [M+H] <sup>+</sup> | 66 | Amino acids, peptides, and analogues | Endogenous                                 | -      | -                                                                                                                                                                                                                                                        | -                                                                                                                                                                                                                                                                                                                                                                                                                                                                                                                                                                                                                                                                                                                                                                                                                                                                                                                                                                                                                                      |

## Study of the MFN2<sup>Ile213Thr</sup> mutant

|          |         |         |          |        |             |                                                            |                    |    |                                           |                                            |        |                                                                                                                                  |                                                                                                                                                                                                                                                                                                                                     |
|----------|---------|---------|----------|--------|-------------|------------------------------------------------------------|--------------------|----|-------------------------------------------|--------------------------------------------|--------|----------------------------------------------------------------------------------------------------------------------------------|-------------------------------------------------------------------------------------------------------------------------------------------------------------------------------------------------------------------------------------------------------------------------------------------------------------------------------------|
| 239.1487 | 3.0514  | 1.6095  | 0.002226 | 2.2403 | HMDB0139940 | N-(3-aminopropyl)-3-(3,4-dihydroxyphenyl)propanimidic acid | [M+H] <sup>+</sup> | 41 | Benzene-diols                             | Endogenous                                 | -      | -                                                                                                                                | -                                                                                                                                                                                                                                                                                                                                   |
| 268.1042 | 2.1692  | 1.1172  | 0.079006 | 1.7731 | HMDB0000050 | Adenosine                                                  | [M+H] <sup>+</sup> | 0  | -                                         | Endogenous   Food   Synthetic   Biological | C00212 | map00230; map01100; map02010; map04022; map04024; map04071; map04080; map04270; map04923; map04924; map05012; map05032; map05034 | Purine metabolism; Metabolic pathways; ABC transporters; cGMP-PKG signaling pathway; cAMP signaling pathway; Sphingolipid signaling pathway; Neuroactive ligand-receptor interaction; Vascular smooth muscle contraction; Regulation of lipolysis in adipocytes; Renin secretion; Parkinson disease; Morphine addiction; Alcoholism |
| 337.2046 | 0.42024 | -1.2507 | 0.055779 | 1.8655 | HMDB0040566 | [6]-Gingerdiol 3-acetate                                   | [M-H] <sup>-</sup> | 8  | Fatty alcohol esters                      | Food   Endogenous   Biological             | -      | -                                                                                                                                | -                                                                                                                                                                                                                                                                                                                                   |
| 341.3064 | 0.28176 | -1.8275 | 0.070702 | 1.8045 | HMDB0032476 | Polyoxyethylene (600) monoricinoleate                      | [M+H] <sup>+</sup> | 4  | Fatty alcohols                            | Endogenous   Food   Biological             | -      | -                                                                                                                                | -                                                                                                                                                                                                                                                                                                                                   |
| 400.345  | 0.23881 | -2.0661 | 0.021729 | 2.0443 | HMDB0000222 | L-Palmitoylcarnitine                                       | [M+H] <sup>+</sup> | 7  | Fatty acid esters                         | Endogenous   Food   Biological             | C02990 | map00071; map01212                                                                                                               | Fatty acid degradation; Fatty acid metabolism                                                                                                                                                                                                                                                                                       |
| 417.2988 | 2.3256  | 1.2176  | 0.06897  | 1.8113 | HMDB0036886 | beta-Carotinal                                             | [M+H] <sup>+</sup> | 39 | Triterpenoids                             | Endogenous   Food   Biological             | -      | -                                                                                                                                | -                                                                                                                                                                                                                                                                                                                                   |
| 425.125  | 2.3924  | 1.2585  | 0.090263 | 1.7328 | HMDB0003556 | Chitobiose                                                 | [M-H] <sup>-</sup> | 38 | Carbohydrates and carbohydrate conjugates | Endogenous                                 | C01674 | map00520; map01100; map02010; map02060                                                                                           | Amino sugar and nucleotide sugar metabolism; Metabolic pathways; ABC transporters; Phosphotransferase system (PTS)                                                                                                                                                                                                                  |
| 455.0973 | 2.9588  | 1.565   | 0.041847 | 1.9298 | HMDB0001520 | Flavin mononucleotide                                      | [M-H] <sup>-</sup> | 0  | -                                         | Endogenous   Food   Biological             | C00061 | map00190; map00740; map00997; map01057; map01100; map01110; map01240; map04977                                                   | Oxidative phosphorylation; Riboflavin metabolism; Biosynthesis of various secondary metabolites - part 3; Biosynthesis of type II polyketide products; Metabolic pathways; Biosynthesis of secondary metabolites; Biosynthesis of cofactors; Vitamin digestion and absorption                                                       |

## Study of the MFN2<sup>Ile213Thr</sup> mutant

|          |         |         |          |        |             |                                       |          |    |                                      |                              |        |                    |                                                              |  |
|----------|---------|---------|----------|--------|-------------|---------------------------------------|----------|----|--------------------------------------|------------------------------|--------|--------------------|--------------------------------------------------------------|--|
| 485.2707 | 0.24874 | -2.0073 | 0.068811 | 1.8119 | HMDB0011156 | PA (0-20:4 (5Z,8Z,11Z,14Z)/2:0)       | [M-H]-   | 7  | Glycerophosphates                    | Endogenous  Food  Biological | -      | -                  | -                                                            |  |
| 494.3191 | 0.46812 | -1.095  | 0.074051 | 1.7917 | HMDB0010383 | LysoPC (16:1 (9Z)/0:0)                | [M+H]+   | 10 | Glycerophosphocholines               | Endogenous  Food  Biological | C04230 | map00564; map05231 | Glycerophospholipid metabolism; Choline metabolism in cancer |  |
| 504.3039 | 0.40545 | -1.3024 | 0.093119 | 1.723  | HMDB0010381 | LysoPC (15:0/0:0)                     | [M+Na]+  | 4  | Glycerophosphocholines               | Endogenous  Food  Biological | C04230 | map00564; map05231 | Glycerophospholipid metabolism; Choline metabolism in cancer |  |
| 505.3484 | 21.317  | 4.4139  | 0.06939  | 1.8096 | HMDB0032111 | Adlupone                              | [M+Na]+  | 39 | Carbonyl compounds                   | Endogenous  Food             | -      | -                  | -                                                            |  |
| 512.2956 | 0.43086 | -1.2147 | 0.088452 | 1.7392 | HMDB0002639 | Sulfolithocholylglycine               | [M-H]-   | 53 | Bile acids, alcohols and derivatives | Endogenous  Food  Biological | C11301 | -                  | -                                                            |  |
| 539.3611 | 0.19266 | -2.3759 | 0.061443 | 1.8416 | HMDB0002815 | LysoPC (18:1 (9Z)/0:0)                | [M+NH4]+ | 39 | Glycerophosphocholines               | Endogenous  Food  Biological | -      | -                  | -                                                            |  |
| 539.5361 | 2.953   | 1.5622  | 0.050784 | 1.8876 | HMDB0041080 | 9-Hydroxytridecyl docosanoate         | [M+H]+   | 7  | Fatty acid esters                    | Food  Endogenous  Biological | -      | -                  | -                                                            |  |
| 540.329  | 0.48503 | -1.0439 | 0.076519 | 1.7824 | HMDB0010397 | LysoPC (20:5 (5Z,8Z,11Z,14Z,17Z)/0:0) | [M-H]-   | 36 | Glycerophosphocholines               | Endogenous  Food  Biological | C04230 | map00564; map05231 | Glycerophospholipid metabolism; Choline metabolism in cancer |  |
| 544.3388 | 0.30709 | -1.7033 | 0.009198 | 2.1457 | HMDB0010395 | LysoPC (20:4 (5Z,8Z,11Z,14Z)/0:0)     | [M+H]+   | 2  | Glycerophosphocholines               | Endogenous  Food  Biological | C04230 | map00564; map05231 | Glycerophospholipid metabolism; Choline metabolism in cancer |  |
| 553.3832 | 2.6147  | 1.3866  | 0.048019 | 1.9002 | HMDB0033632 | Furohyperforin                        | [M+H]+   | 10 | Monoterpenoids                       | Endogenous  Food  Biological | -      | -                  | -                                                            |  |



## Study of the MFN2<sup>Ile213Thr</sup> mutant

|          |         |         |          |        |             |                                       |        |    |                                      |                                |        |                                                                                                                                                      |                                                                                                                                                                                                                                                                                                                                                                                                                                                                                                             |
|----------|---------|---------|----------|--------|-------------|---------------------------------------|--------|----|--------------------------------------|--------------------------------|--------|------------------------------------------------------------------------------------------------------------------------------------------------------|-------------------------------------------------------------------------------------------------------------------------------------------------------------------------------------------------------------------------------------------------------------------------------------------------------------------------------------------------------------------------------------------------------------------------------------------------------------------------------------------------------------|
| 565.0451 | 4.2373  | 2.0831  | 0.090551 | 1.7318 | HMDB0000286 | Uridine diphosphate glucose           | [M-H]- | 5  | Pyrimidine nucleotide sugars         | Endogenous   Food   Biological | C00029 | map00040; map00052; map00053; map00240; map00500; map00520; map00524; map00541; map00561; map00908; map01051; map01060; map01100; map01110; map01240 | Pentose and glucuronate interconversions; Galactose metabolism; Ascorbate and aldarate metabolism; Pyrimidine metabolism; Starch and sucrose metabolism; Amino sugar and nucleotide sugar metabolism; Neomycin, kanamycin and gentamicin biosynthesis; O-Antigen nucleotide sugar biosynthesis; Glycerolipid metabolism; Zeatin biosynthesis; Biosynthesis of ansamycins; Biosynthesis of plant secondary metabolites; Metabolic pathways; Biosynthesis of secondary metabolites; Biosynthesis of cofactors |
| 570.3544 | 0.2986  | -1.7437 | 0.007826 | 2.1603 | HMDB0010402 | LysoPC (22:5 (4Z,7Z,10Z,13Z,16Z)/0:0) | [M+H]+ | 2  | Glycerophosphocholines               | Endogenous   Food   Biological | C04230 | map00564; map05231                                                                                                                                   | Glycerophospholipid metabolism; Choline metabolism in cancer                                                                                                                                                                                                                                                                                                                                                                                                                                                |
| 590.3433 | 0.23028 | -2.1185 | 0.044356 | 1.9175 | HMDB0029334 | Nummularine B                         | [M-H]- | 76 | Amino acids, peptides, and analogues | Endogenous   Food   Biological | -      | -                                                                                                                                                    | -                                                                                                                                                                                                                                                                                                                                                                                                                                                                                                           |
| 594.2841 | 0.47768 | -1.0659 | 0.054713 | 1.8701 | HMDB0002581 | Taurocholic acid 3-sulfate            | [M-H]- | 72 | Bile acids, alcohols and derivatives | Endogenous   Food   Biological | -      | -                                                                                                                                                    | -                                                                                                                                                                                                                                                                                                                                                                                                                                                                                                           |
| 609.5544 | 2.1783  | 1.1232  | 0.034531 | 1.9675 | HMDB0060057 | CE (15:0)                             | [M-H]- | 12 | Steroid esters                       | Food   Endogenous   Biological | -      | -                                                                                                                                                    | -                                                                                                                                                                                                                                                                                                                                                                                                                                                                                                           |
| 623.5026 | 4.8138  | 2.2672  | 0.013259 | 2.108  | HMDB0029958 | Asitribin                             | [M+H]+ | 23 | Fatty alcohols                       | Food   Endogenous   Biological | -      | -                                                                                                                                                    | -                                                                                                                                                                                                                                                                                                                                                                                                                                                                                                           |
| 625.3451 | 5.122   | 2.3567  | 0.084958 | 1.7515 | HMDB0034091 | Ponasteroside A                       | [M-H]- | 23 | Steroid glycosides                   | Endogenous   Food   Biological | -      | -                                                                                                                                                    | -                                                                                                                                                                                                                                                                                                                                                                                                                                                                                                           |
| 645.2995 | 0.47979 | -1.0595 | 0.082563 | 1.7601 | HMDB0030736 | Capsianoside IV                       | [M+H]+ | 75 | Fatty acyl glycosides                | Endogenous   Food   Biological | -      | -                                                                                                                                                    | -                                                                                                                                                                                                                                                                                                                                                                                                                                                                                                           |
| 648.4355 | 2.8519  | 1.5119  | 0.023982 | 2.0294 | HMDB0008856 | PE (14:1 (9Z)/15:0)                   | [M+H]+ | 38 | Glycerophosphoethanolamines          | Endogenous   Food   Biological | -      | -                                                                                                                                                    | -                                                                                                                                                                                                                                                                                                                                                                                                                                                                                                           |

## Study of the MFN2<sup>Ile213Thr</sup> mutant

|          |         |         |          |        |             |                                                       |          |    |                                            |                                           |        |                                                                                                                                                                                                                                                                                                                                                                                                                                                                                           |   |  |  |
|----------|---------|---------|----------|--------|-------------|-------------------------------------------------------|----------|----|--------------------------------------------|-------------------------------------------|--------|-------------------------------------------------------------------------------------------------------------------------------------------------------------------------------------------------------------------------------------------------------------------------------------------------------------------------------------------------------------------------------------------------------------------------------------------------------------------------------------------|---|--|--|
| 662.1056 | 15.383  | 3.9432  | 0.040327 | 1.9373 | HMDB0000902 | NAD                                                   | [M-H]-   | 6  | -                                          | Endogenous                                | C00003 | map00190; Oxidative phosphorylation; Thiamine<br>map00730; metabolism; Nicotinate and nicotinamide me-<br>map00760; tabolism; Drug metabolism - other enzymes;<br>map00983; Metabolic pathways; Biosynthesis of cofac-<br>map01100; tors; AMPK signaling pathway; Longevity regu-<br>map01240; lating pathway; Longevity regulating pathway<br>map04152; - worm; Aldosterone synthesis and secretion;<br>map04211; Vitamin digestion and absorption<br>map04212;<br>map04925;<br>map04977 |   |  |  |
| 675.5414 | 0.37932 | -1.3985 | 0.085516 | 1.7495 | HMDB0012097 | SM (d18:1/<br>14:0)                                   | [M+H]+   | 3  | Phospho-<br>sphingo-<br>lipids             | Endog-<br>enous  <br>Food  <br>Biological | -      | -                                                                                                                                                                                                                                                                                                                                                                                                                                                                                         | - |  |  |
| 688.5332 | 2.9021  | 1.5371  | 0.037444 | 1.9521 | HMDB0114836 | PA (16:0/<br>18:3 (6Z,<br>9Z,12Z))                    | [M+NH4]+ | 61 | Glycero-<br>phos-<br>phates                | Food  <br>Endog-<br>enous  <br>Biological | -      | -                                                                                                                                                                                                                                                                                                                                                                                                                                                                                         | - |  |  |
| 694.5228 | 0.27354 | -1.8702 | 0.045556 | 1.9118 | HMDB0012321 | Galactosylce-<br>ramide<br>(d18:1/<br>14:0)           | [M+Na]+  | 0  | Glyco-<br>sphingo-<br>lipids               | Endog-<br>enous  <br>Food  <br>Biological | C02686 | -                                                                                                                                                                                                                                                                                                                                                                                                                                                                                         | - |  |  |
| 696.5389 | 3.1372  | 1.6495  | 0.02101  | 2.0491 | HMDB0009213 | PE (18:4<br>(6Z,9Z,<br>12Z,15Z)/<br>P-16:0)           | [M+H]+   | 61 | Glycero-<br>phospho-<br>ethanol-<br>amines | Endog-<br>enous  <br>Food  <br>Biological | -      | -                                                                                                                                                                                                                                                                                                                                                                                                                                                                                         | - |  |  |
| 703.5717 | 2.5709  | 1.3623  | 0.027878 | 2.0053 | HMDB0010169 | SM (d18:1/<br>16:0)                                   | [M+H]+   | 5  | Phospho-<br>sphingo-<br>lipids             | Endog-<br>enous  <br>Food  <br>Biological | -      | -                                                                                                                                                                                                                                                                                                                                                                                                                                                                                         | - |  |  |
| 722.5062 | 0.38759 | -1.3674 | 0.088715 | 1.7382 | HMDB0009215 | PE (18:4<br>(6Z,9Z,<br>12Z,15Z)/<br>P-18:<br>1 (11Z)) | [M+H]+   | 8  | Glycero-<br>phospho-<br>ethanol-<br>amines | Endog-<br>enous  <br>Food  <br>Biological | -      | -                                                                                                                                                                                                                                                                                                                                                                                                                                                                                         | - |  |  |
| 730.5422 | 0.25198 | -1.9886 | 0.002753 | 2.2301 | HMDB0007874 | PC (14:<br>0/18:2<br>(9Z,12Z))                        | [M+H]+   | 5  | Glycero-<br>phospho-<br>cholines           | Endog-<br>enous  <br>Food  <br>Biological | -      | -                                                                                                                                                                                                                                                                                                                                                                                                                                                                                         | - |  |  |
| 732.5532 | 0.25701 | -1.9601 | 0.014425 | 2.0983 | HMDB0007872 | PC (14:0/<br>18:1 (11Z))                              | [M+H]+   | 1  | Glycero-<br>phospho-<br>cholines           | Endog-<br>enous  <br>Food  <br>Biological | -      | -                                                                                                                                                                                                                                                                                                                                                                                                                                                                                         | - |  |  |

## Study of the MFN2<sup>Ile213Thr</sup> mutant

|          |         |         |          |        |             |                                                           |                     |    |                                            |                                         |        |                                                                                                                               |                                                                                                                                                                                                                                                                                                                                           |
|----------|---------|---------|----------|--------|-------------|-----------------------------------------------------------|---------------------|----|--------------------------------------------|-----------------------------------------|--------|-------------------------------------------------------------------------------------------------------------------------------|-------------------------------------------------------------------------------------------------------------------------------------------------------------------------------------------------------------------------------------------------------------------------------------------------------------------------------------------|
| 736.4773 | 0.47898 | -1.0619 | 0.073823 | 1.7925 | HMDB0008847 | PE (14:0/<br>22:6 (4Z,<br>7Z,10Z,<br>13Z,<br>16Z,19Z))    | [M+H] <sup>+</sup>  | 19 | Glycero-<br>phospho-<br>ethanol-<br>amines | Endog-<br>enous <br>Food <br>Biological | C00350 | map00563;<br>map00564;<br>map01100;<br>map01110;<br>map04136;<br>map04138;<br>map04140;<br>map04723;<br>map05130;<br>map05167 | Glycosylphosphatidylinositol (GPI)-anchor biosynthesis; Glycerophospholipid metabolism; Metabolic pathways; Biosynthesis of secondary metabolites; Autophagy - other; Autophagy - yeast; Autophagy - animal; Retrograde endocannabinoid signaling; Pathogenic Escherichia coli infection; Kaposi sarcoma-associated herpesvirus infection |
| 744.5588 | 0.21351 | -2.2276 | 0.041524 | 1.9314 | HMDB0007938 | PC (15:0/<br>18:1 (11Z))                                  | [M-H] <sup>-</sup>  | 5  | Glycero-<br>phospho-<br>cholines           | Endog-<br>enous <br>Food <br>Biological | C00157 | map00564;<br>map00590;<br>map00591;<br>map00592;<br>map01100;<br>map01110;<br>map04723;<br>map05231                           | Glycerophospholipid metabolism; Arachidonic acid metabolism; Linoleic acid metabolism; alpha-Linolenic acid metabolism; Metabolic pathways; Biosynthesis of secondary metabolites; Retrograde endocannabinoid signaling; Choline metabolism in cancer                                                                                     |
| 746.5048 | 0.38267 | -1.3858 | 0.009179 | 2.1459 | HMDB0112425 | PS (18:2<br>(9Z,12Z)/<br>15:0)                            | [M+H] <sup>+</sup>  | 11 | Glycero-<br>phospho-<br>serines            | Food <br>Endog-<br>enous <br>Biological | -      | -                                                                                                                             | -                                                                                                                                                                                                                                                                                                                                         |
| 748.5233 | 2.1143  | 1.0802  | 0.084229 | 1.7541 | HMDB0005780 | PE (P-16:0/<br>22:6 (4Z,7Z,<br>10Z,13Z,<br>16Z,19Z))      | [M+H] <sup>+</sup>  | 6  | Glycero-<br>phospho-<br>ethanol-<br>amines | Endog-<br>enous <br>Food <br>Biological | C00350 | map00563;<br>map00564;<br>map01100;<br>map01110;<br>map04136;<br>map04138;<br>map04140;<br>map04723;<br>map05130;<br>map05167 | Glycosylphosphatidylinositol (GPI)-anchor biosynthesis; Glycerophospholipid metabolism; Metabolic pathways; Biosynthesis of secondary metabolites; Autophagy - other; Autophagy - yeast; Autophagy - animal; Retrograde endocannabinoid signaling; Pathogenic Escherichia coli infection; Kaposi sarcoma-associated herpesvirus infection |
| 749.524  | 0.47217 | -1.0826 | 0.037025 | 1.9543 | HMDB0030449 | 20-Deoxynarasin                                           | [M+H] <sup>+</sup>  | 6  | Terpene<br>glyco-<br>sides                 | Endog-<br>enous <br>Food <br>Biological | -      | -                                                                                                                             | -                                                                                                                                                                                                                                                                                                                                         |
| 769.5023 | 2.3254  | 1.2175  | 0.019433 | 2.0601 | HMDB0010575 | PG (16:0/<br>18:2 (9Z,12Z))                               | [M+Na] <sup>+</sup> | 4  | Glycero-<br>phospho-<br>glycerols          | Endog-<br>enous <br>Food <br>Biological | -      | -                                                                                                                             | -                                                                                                                                                                                                                                                                                                                                         |
| 772.5854 | 0.27789 | -1.8474 | 0.082765 | 1.7594 | HMDB0007946 | PC (15:0/<br>20:2 (11Z,14Z))                              | [M+H] <sup>+</sup>  | 0  | Glycero-<br>phospho-<br>cholines           | Endog-<br>enous <br>Food <br>Biological | -      | -                                                                                                                             | -                                                                                                                                                                                                                                                                                                                                         |
| 776.5609 | 2.6157  | 1.3872  | 0.034865 | 1.9657 | HMDB0009644 | PE (22:5<br>(4Z,7Z,<br>10Z,13Z,<br>16Z)/<br>P-18:1 (11Z)) | [M+H] <sup>+</sup>  | 3  | Glycero-<br>phospho-<br>ethanol-<br>amines | Endog-<br>enous <br>Food <br>Biological | -      | -                                                                                                                             | -                                                                                                                                                                                                                                                                                                                                         |

## Study of the MFN2<sup>Ile213Thr</sup> mutant

|          |         |         |          |        |             |                                                   |                     |    |                             |                                |        |                    |                                             |
|----------|---------|---------|----------|--------|-------------|---------------------------------------------------|---------------------|----|-----------------------------|--------------------------------|--------|--------------------|---------------------------------------------|
| 779.53   | 0.16474 | -2.6018 | 0.054714 | 1.8701 | HMDB0115112 | PA (20:1(11Z)/22:4 (7Z,10Z,13Z,16Z))              | [M+H] <sup>+</sup>  | 37 | Glycerophosphates           | Food   Endogenous   Biological | -      | -                  | -                                           |
| 780.5078 | 0.43494 | -1.2011 | 0.026025 | 2.0166 | HMDB0012313 | 3-O-Sulfolactosylceramide (d18:1/16:0)            | [M+H] <sup>+</sup>  | 27 | Glycosphingolipids          | Endogenous   Food   Biological | C06125 | map00600; map01100 | Sphingolipid metabolism; Metabolic pathways |
| 780.5469 | 2.9935  | 1.5819  | 0.01826  | 2.0686 | HMDB0007890 | PC (14:0/22:5 (4Z,7Z,10Z,13Z,16Z))                | [M+H] <sup>+</sup>  | 9  | Glycerophosphocholines      | Endogenous   Food   Biological | -      | -                  | -                                           |
| 794.5675 | 0.40669 | -1.298  | 0.015275 | 2.0914 | HMDB0007956 | PC (15:0/22:5 (4Z,7Z,10Z,13Z,16Z))                | [M+H] <sup>+</sup>  | 3  | Glycerophosphocholines      | Endogenous   Food   Biological | -      | -                  | -                                           |
| 797.525  | 0.27068 | -1.8854 | 0.033184 | 1.9749 | HMDB0010581 | PG (16:0/22:4 (7Z,10Z,13Z,16Z))                   | [M-H] <sup>-</sup>  | 11 | Glycerophosphoglycerols     | Endogenous   Food   Biological | -      | -                  | -                                           |
| 804.548  | 0.41074 | -1.2837 | 0.010467 | 2.1332 | HMDB0007889 | PC (14:0/22:4 (7Z,10Z,13Z,16Z))                   | [M+Na] <sup>+</sup> | 4  | Glycerophosphocholines      | Endogenous   Food   Biological | -      | -                  | -                                           |
| 806.5619 | 0.27614 | -1.8565 | 0.032865 | 1.9766 | HMDB0004866 | LacCer (d18:1/12:0)                               | [M+H] <sup>+</sup>  | 1  | -                           | Endogenous   Food   Biological | -      | -                  | -                                           |
| 825.5572 | 0.22222 | -2.1699 | 0.033226 | 1.9746 | HMDB0061422 | PC (DiMe (9,3)/MonoMe (11,3))                     | [M+H] <sup>+</sup>  | 7  | Glycerophosphocholines      | Endogenous   Food   Biological | -      | -                  | -                                           |
| 826.5584 | 8.1981  | 3.0353  | 0.001533 | 2.2558 | HMDB0008189 | PC (18:3(6Z,9Z,12Z)/22:6 (4Z,7Z,10Z,13Z,16Z,19Z)) | [M-H] <sup>-</sup>  | 23 | Glycerophosphocholines      | Endogenous   Food   Biological | -      | -                  | -                                           |
| 840.5239 | 0.29165 | -1.7777 | 0.057932 | 1.8563 | HMDB0061555 | PS (DiMe (11,3)/DiMe (9,3))                       | [M+H] <sup>+</sup>  | 26 | Glycerophosphoserines       | Endogenous   Food   Biological | -      | -                  | -                                           |
| 854.6698 | 0.33573 | -1.5746 | 0.068492 | 1.8131 | HMDB0009278 | PE (20:1 (11Z)/24:1 (15Z))                        | [M-H] <sup>-</sup>  | 6  | Glycerophosphoethanolamines | Endogenous   Food   Biological | -      | -                  | -                                           |

## Study of the MFN2<sup>Ile213Thr</sup> mutant

|          |         |         |          |        |             |                                                                |         |    |                           |                                 |        |   |   |
|----------|---------|---------|----------|--------|-------------|----------------------------------------------------------------|---------|----|---------------------------|---------------------------------|--------|---|---|
| 865.5056 | 5.0623  | 2.3398  | 0.08721  | 1.7435 | HMDB0116605 | PG (22:6 (4Z,7Z,10Z,13Z,16Z,19Z)/22:6 (4Z,7Z,10Z,13Z,16Z,19Z)) | [M-H]-  | 4  | Glycero-phospho-glycerols | Food   Endog-enous   Biological | -      | - | - |
| 889.5481 | 0.46291 | -1.1112 | 0.05578  | 1.8655 | HMDB0009785 | PI (16:0/20:0)                                                 | [M+Na]+ | 33 | Glycero-phospho-inositols | Endog-enous   Food   Biological | -      | - | - |
| 913.5269 | 0.40101 | -1.3183 | 0.078158 | 1.7763 | HMDB0034650 | Soyasaponin II                                                 | [M+H]+  | 12 | Terpene glyco-sides       | Endog-enous   Food   Biological | C12081 | - | - |
| 952.5933 | 0.2021  | -2.3068 | 0.037455 | 1.952  | HMDB0061563 | PS (DiMe (11,5)/DiMe (13,5))                                   | [M+H]+  | 36 | Glycero-phospho-serines   | Endog-enous   Food   Biological | -      | - | - |
| 1151.703 | 0.1284  | -2.9613 | 0.069028 | 1.811  | HMDB0004844 | Ganglioside GM3 (d18:1/16:0)                                   | [M-H]-  | 2  | Glyco-sphingo-lipids      | Endog-enous   Food   Biological | C04730 | - | - |

---
